# Supplementary material for: Change my mind
Source: Atypon-hosted journal article supplement (doi:10.1024/1010-0652/a000379), 2024-03-18
Supplement: 1010-0652_a000379_esm1.pdf [file 1010-0652_a000379_esm1.pdf]

## Electronic Supplementary Material 1

### Items for the expectation tests of the Bachelor's Program in Economic and Business Education, the Bachelor's Program in Sociology, and the Integrated LL.B. and State Examination Program in Law

#### 1. Expectation check of the Bachelor's program in Sociology

|                                                                |                                                                                                                                                                                                                                                                                                                                                                                                                                                                                                                                                                                                                                                                                                                                                      |                                                                                                                                               |
|----------------------------------------------------------------|------------------------------------------------------------------------------------------------------------------------------------------------------------------------------------------------------------------------------------------------------------------------------------------------------------------------------------------------------------------------------------------------------------------------------------------------------------------------------------------------------------------------------------------------------------------------------------------------------------------------------------------------------------------------------------------------------------------------------------------------------|-----------------------------------------------------------------------------------------------------------------------------------------------|
| Instruktion<br><i>Instruction</i>                              | <p>Der folgende Fragebogen besteht aus einer Liste mit verschiedenen Studieninhalten und Studienanforderungen, die in unterschiedlichem Ausmaß Bestandteil des Bachelorstudiengangs Soziologie sind.<br/>Geben Sie bitte für jeden Studieninhalt und jede Studienanforderung an, in welchem zeitlichen Ausmaß sie diese/n in Bezug auf die gesamte Bachelorstudienzeit erwarten.</p> <p><i>The following questionnaire consists of a list of various study content and study requirements that are part of the Bachelor's program in Sociology to varying degrees.<br/>For each study content and study requirement, please indicate to what extent in terms of time you expect this/these to be part of the entire bachelor's study period.</i></p> |                                                                                                                                               |
| Itemstamm<br><i>Item stem</i>                                  | <p>In welchem zeitlichen Ausmaß erwarten Sie, sich im Bachelorstudiengang Soziologie damit zu beschäftigen ...<br/><i>To what extent do you expect to deal with ... in your Bachelor's Program in Sociology</i></p>                                                                                                                                                                                                                                                                                                                                                                                                                                                                                                                                  |                                                                                                                                               |
| Antwortoptionen<br><i>Response options</i>                     | <p>Geschlossen, 6-stufig<br/>1 = gar nicht<br/>2 = in einem sehr geringen zeitlichen Ausmaß<br/>3 = in einem geringen zeitlichen Ausmaß<br/>4 = in einem mittleren zeitlichen Ausmaß<br/>5 = in einem großen zeitlichen Ausmaß<br/>6 = in einem sehr großen zeitlichen Ausmaß</p>                                                                                                                                                                                                                                                                                                                                                                                                                                                                    | <p><i>1 = not at all<br/>2 = very low extent<br/>3 = low extent<br/>4 = average extent<br/>5 = large extent<br/>6 = very large extent</i></p> |
| <p>Basismodul Soziologie<br/><i>basic module sociology</i></p> |                                                                                                                                                                                                                                                                                                                                                                                                                                                                                                                                                                                                                                                                                                                                                      |                                                                                                                                               |
| Variablenname<br><i>Variable name</i>                          | Wortlaut<br><i>Item wording</i>                                                                                                                                                                                                                                                                                                                                                                                                                                                                                                                                                                                                                                                                                                                      |                                                                                                                                               |
| Soz_BM_SozI_1                                                  | <p>... wie individuelles Handeln gesellschaftliche Phänomene (z.B. Bevölkerungsentwicklung, soziale Ungleichheit) erklärt.<br/><i>... how individual action explains social phenomena (e.g., population trends, social inequality) ...</i></p>                                                                                                                                                                                                                                                                                                                                                                                                                                                                                                       |                                                                                                                                               |
| Soz_BM_SozI_2                                                  | <p>... klassische soziologische Werke zu lesen (z.B. Karl Marx, Max Weber usw.).<br/><i>... reading classic sociological books (e.g., Karl Marx, Max Weber, etc.) ...</i></p>                                                                                                                                                                                                                                                                                                                                                                                                                                                                                                                                                                        |                                                                                                                                               |
| Soz_BM_SozI_3                                                  | <p>... wie Normen und Werte eine Gesellschaft beeinflussen.<br/><i>... how norms and values influence a society ...</i></p>                                                                                                                                                                                                                                                                                                                                                                                                                                                                                                                                                                                                                          |                                                                                                                                               |

|                                                                                 |                                                                                                                                                                                                                                                                                       |
|---------------------------------------------------------------------------------|---------------------------------------------------------------------------------------------------------------------------------------------------------------------------------------------------------------------------------------------------------------------------------------|
| Soz_BM_Sozi_4                                                                   | ... wie verbindliche Regeln zustande kommen und wie sie in Wechselwirkung mit der Gesellschaft stehen.<br>... <i>how binding rules emerge and how they interact with society ...</i>                                                                                                  |
| Basismodul Soziologie II<br><i>basic module sociology II</i>                    |                                                                                                                                                                                                                                                                                       |
| Variablenname<br><i>Variable name</i>                                           | Wortlaut<br><i>Item wording</i>                                                                                                                                                                                                                                                       |
| Soz_BM_SozII_1                                                                  | ... die Sozialstruktur Deutschlands (z.B. Arbeitsmarktaufbau, Bildungssystem) mit der anderer europäischer Länder zu vergleichen.<br>... <i>comparing the social structure of Germany (e.g., labor market structure, education system) with those of other European countries ...</i> |
| Soz_BM_SozII_2                                                                  | ... wie Migration und Integration moderne Gesellschaften beeinflussen (z.B. Deutschland).<br>... <i>how migration and integration affect modern societies (e.g., Germany) ...</i>                                                                                                     |
| Soz_BM_SozII_3                                                                  | ... wie der demografische Wandel die gesellschaftliche Entwicklung beeinflusst (z.B. sinkende Geburtenrate, Alterung usw.).<br>... <i>how demographic change affects societal development (e.g., declining birthrate, aging, etc.) ...</i>                                            |
| Soz_BM_SozII_4                                                                  | ... wie soziale Ungleichheit in Deutschland reproduziert wird (z.B. im Bildungssystem).<br>... <i>how social inequality is reproduced in Germany (e.g., in the education system) ...</i>                                                                                              |
| Basismodul Sozialpsychologie<br><i>basic module social psychology</i>           |                                                                                                                                                                                                                                                                                       |
| Variablenname<br><i>Variable name</i>                                           | Wortlaut<br><i>Item wording</i>                                                                                                                                                                                                                                                       |
| Soz_BM_SozPsy_1                                                                 | ... welche kognitiven Prozesse bei der Informationsverarbeitung eine Rolle spielen.<br>... <i>what cognitive processes are involved in information processing ...</i>                                                                                                                 |
| Soz_BM_SozPsy_2                                                                 | ... wie Gruppenprozesse ablaufen und Gruppen das Verhalten von Einzelpersonen beeinflussen.<br>... <i>how group processes work and how groups influence the behavior of individuals ...</i>                                                                                           |
| Soz_BM_SozPsy_3                                                                 | ... welche kognitiven Prozesse bei der Entstehung von Einstellungen involviert sind.<br>... <i>what cognitive processes are involved in the formation of attitudes ...</i>                                                                                                            |
| Soz_BM_SozPsy_4                                                                 | ... wie soziale Urteile entstehen, z.B. in Form von Vorurteilen/Stereotypen.<br>... <i>how social judgments are formed, e.g., in the form of prejudices/stereotypes ...</i>                                                                                                           |
| Basismodul Methoden und Statistik<br><i>Basic module methods and statistics</i> |                                                                                                                                                                                                                                                                                       |
| Variablenname<br><i>Variable name</i>                                           | Wortlaut<br><i>Item wording</i>                                                                                                                                                                                                                                                       |
| Soz_BM_Statistik_1                                                              | ... grundlegende Regeln zur Fragebogenkonstruktion zu lernen.<br>... <i>learning basic rules of questionnaire construction ...</i>                                                                                                                                                    |
| Soz_BM_Statistik_2                                                              | ... wie man Daten mithilfe von Statistik korrekt beschreiben kann.<br>... <i>how to correctly describe data using statistics...</i>                                                                                                                                                   |
| Soz_BM_Statistik_3                                                              | ... wie man die Ergebnisse statistischer Analysen richtig interpretiert.<br>... <i>how to properly interpret the results of statistical analyses...</i>                                                                                                                               |
| Soz_BM_Statistik_4                                                              | ... welche mathematischen Methoden die empirische Wissenschaft* nutzt und welche theoretischen Überlegungen diesen zugrunde liegen.<br>... <i>what mathematical methods empirical science* uses and what theoretical considerations underlie them ...</i>                             |

| Aufbaumodul Allgemeine und Spezielle Soziologie<br><i>advanced module and special sociology</i> |                                                                                                                                                                                                                                                                                              |
|-------------------------------------------------------------------------------------------------|----------------------------------------------------------------------------------------------------------------------------------------------------------------------------------------------------------------------------------------------------------------------------------------------|
| Variablenname<br><i>Variable name</i>                                                           | Wortlaut<br><i>Item wording</i>                                                                                                                                                                                                                                                              |
| Soz_AM_SpezSoz_1                                                                                | ... unter welchen Umständen die Integration von Migranten/Kindern von Migranten besonders gut gelingt.<br><i>... the circumstances under which the integration of migrants/children of migrants is particularly successful...</i>                                                            |
| Soz_AM_SpezSoz_2                                                                                | ... welche (in-)formellen Regeln die Entstehung und Entwicklung wirtschaftlicher Organisationen* beeinflussen.<br><i>... which (in-)formal rules influence the formation and development of economic organizations*...</i>                                                                   |
| Soz_AM_SpezSoz_3                                                                                | ... wie und warum sich Familienmodelle verändern (Scheidung, Patchwork, Kinderanzahl).<br><i>... how and why family models change (divorce, patchwork, number of children)...</i>                                                                                                            |
| Soz_AM_SpezSoz_4                                                                                | ... welche Effekte Bildung auf verschiedene soziale Gruppen hat.<br><i>... what effects education has on different social groups...</i>                                                                                                                                                      |
| Aufbaumodul Sozialpsychologie<br><i>advanced module social psychology</i>                       |                                                                                                                                                                                                                                                                                              |
| Variablenname<br><i>Variable name</i>                                                           | Wortlaut<br><i>Item wording</i>                                                                                                                                                                                                                                                              |
| Soz_AM_SozPsy_1                                                                                 | ... wie die Sprache mit Vorurteilen zusammenhängt (z.B. Bewertung von Personen aufgrund ihres Dialekts).<br><i>...how language relates to prejudice (e.g., evaluating people based on their dialect) ...</i>                                                                                 |
| Soz_AM_SozPsy_2                                                                                 | ... wie sich Erwartungen anderer auf das eigene Verhalten auswirken.<br><i>... how expectations of others affect one's own behavior...</i>                                                                                                                                                   |
| Soz_AM_SozPsy_3                                                                                 | ... was Menschen dazu bringt, pro- oder antisozial zu handeln.<br><i>... what makes people act pro- or anti-socially...</i>                                                                                                                                                                  |
| Soz_AM_SozPsy_4                                                                                 | ... welche Strategien Menschen nutzen, um Urteile über andere und sich selbst zu treffen.<br><i>... studying the strategies people use to make judgments about others and themselves...</i>                                                                                                  |
| Aufbaumodul Statistik<br><i>advanced module statistics</i>                                      |                                                                                                                                                                                                                                                                                              |
| Variablenname<br><i>Variable name</i>                                                           | Wortlaut<br><i>Item wording</i>                                                                                                                                                                                                                                                              |
| Soz_AM_empMethoden_1                                                                            | ... wie man das im Studium erworbene Wissen über statistische Verfahren praktisch anwendet.<br><i>... how to practically apply the knowledge of statistical procedures acquired in your studies.</i>                                                                                         |
| Soz_AM_empMethoden_2                                                                            | ... ein Forschungsprojekt im Team durchzuführen.<br><i>... conducting a research project in a team...</i>                                                                                                                                                                                    |
| Soz_AM_empMethoden_3                                                                            | ... wie man eine wissenschaftliche Fragestellung entwickelt (z. B. Relevanz der Fragestellung, Durchführbarkeit bzgl. Zeit und Mittel).<br><i>... how to develop a scientific research question (e.g. relevance of the research question, feasibility in terms of time and resources)...</i> |
| Soz_AM_empMethoden_4                                                                            | ... wie man statistische Softwareprogramme (z.B. Stata) zur Auswertung von empirischen Daten / großen Datensätzen einsetzt.<br><i>... how to use statistical software programs (e.g., Stata) to analyze empirical data / large data sets...</i>                                              |

| Aufbaumodul Europäische Gesellschaften im Vergleich<br><i>advanced module european societies in comparison</i> |                                                                                                                                                                                                                                                                              |
|----------------------------------------------------------------------------------------------------------------|------------------------------------------------------------------------------------------------------------------------------------------------------------------------------------------------------------------------------------------------------------------------------|
| Variablenname<br><i>Variable name</i>                                                                          | Wortlaut<br><i>Item wording</i>                                                                                                                                                                                                                                              |
| Soz_AM_EUGesell_1                                                                                              | ... wie sich Gesundheitssysteme zwischen europäischen Staaten unterscheiden.<br><i>... how health systems differ between European countries...</i>                                                                                                                           |
| Soz_AM_EUGesell_2                                                                                              | ... wie der Arbeitsmarkt in europäischen Ländern reguliert wird und was für Konsequenzen das hat.<br><i>... how the labor market is regulated in European countries and the consequences this has ...</i>                                                                    |
| Soz_AM_EUGesell_3                                                                                              | ... welche sozialen Folgen der wirtschaftliche Wandel in Europa hat.<br><i>... the social consequences of economic change in Europe...</i>                                                                                                                                   |
| Soz_AM_EUGesell_4                                                                                              | ... ob die in einer Gesellschaft vorherrschende Religion mitbestimmt, welche Rolle der Sozialstaat übernimmt.<br><i>... whether the religion prevalent in a society helps determine the role the social state takes on...</i>                                                |
| Besonderheiten<br><i>specifics</i>                                                                             |                                                                                                                                                                                                                                                                              |
| Variablenname<br><i>Variable name</i>                                                                          | Wortlaut<br><i>Item wording</i>                                                                                                                                                                                                                                              |
| Soz_SpezMA_B1                                                                                                  | ... zusätzliche Qualifikationen wie z.B. EDV-Kenntnisse oder Social Skills zu erwerben.<br><i>... acquiring additional qualifications such as computer skills or social skills ...</i>                                                                                       |
| Soz_SpezMA_B2                                                                                                  | ... welche beruflichen Perspektiven man mit einem Abschluss im Bachelorstudiengang Soziologie hat.<br><i>... learning about possible career paths with a degree ...</i>                                                                                                      |
| Soz_SpezMA_B3                                                                                                  | ... wie man sich (erfolgreich) auf einen Job oder ein Praktikum bewirbt (gesamter Bewerbungsprozess).<br><i>... how to (successfully) apply for a job or internship (entire application process)...</i>                                                                      |
| Soz_SpezMA_B4                                                                                                  | ... andere Fachrichtungen im Rahmen eines Nebenfaches kennenzulernen (z.B. Psychologie, Politikwissenschaft, Betriebswirtschaftslehre).<br><i>... learning about other disciplines as part of a minor (e.g., psychology, political science, business administration) ...</i> |
| Soz_SpezMA_B5                                                                                                  | ... Techniken zur Erhebung und Auswertung qualitativer Daten* zu erlernen (z.B. Interviewdurchführung).<br><i>... learning techniques for gathering and analyzing qualitative data* (e.g., conducting interviews)...</i>                                                     |
| Soz_SpezMA_B6                                                                                                  | ... auf Basis von Interviewdaten und der Beobachtung von Personen sozialwissenschaftliche Theorien zu entwickeln.<br><i>... developing social science theories based on interview data and observation of individuals...</i>                                                 |
| Soz_SpezMA_B7                                                                                                  | ... philosophische Überlegungen zu soziologischen Themen anzustellen.<br><i>... philosophical reflection on sociological issues...</i>                                                                                                                                       |
| Soz_SozAllgemein_C1                                                                                            | ... wie man mithilfe von statistischen Methoden Annahmen auf deren Richtigkeit überprüfen kann.<br><i>... how to use statistical methods to test assumptions for accuracy...</i>                                                                                             |
| Soz_SozAllgemein_C2                                                                                            | ... wie die Prozesse der Europäisierung und Globalisierung ablaufen.<br><i>... how the processes of Europeanization and globalization are taking place...</i>                                                                                                                |
| Soz_SozAllgemein_C3                                                                                            | ... zu analysieren, welche Ursachen es für soziale Ungleichheit gibt.                                                                                                                                                                                                        |

|                                       |                                                                                                                                                                                                                               |
|---------------------------------------|-------------------------------------------------------------------------------------------------------------------------------------------------------------------------------------------------------------------------------|
|                                       | ... analyzing what the causes of social inequality are ...                                                                                                                                                                    |
| Anforderungen<br>Requirements         |                                                                                                                                                                                                                               |
| Variablenname<br><i>Variable name</i> | Wortlaut<br><i>Item wording</i>                                                                                                                                                                                               |
| Soz_Anforderung_1                     | ... auf mathematische Grundkenntnisse in den Bereichen Stochastik/Hypothesentestung aufzubauen.<br>... <i>building on basic mathematical knowledge in the areas of stochastics/hypothesis testing ...</i>                     |
| Soz_Anforderung_2                     | ... englischsprachige Fachliteratur aus wissenschaftlichen Zeitschriften zu lesen.<br>... <i>reading English-language technical literature from scientific journals...</i>                                                    |
| Soz_Anforderung_3                     | ... wissenschaftliche Texte (Hausarbeiten, Abschlussarbeit, Essay) zu verfassen.<br>... <i>writing scientific texts (term papers, thesis, essay)...</i>                                                                       |
| Soz_Anforderung_4                     | ... eigenständig sein Profil zu schärfen und Schwerpunkte zu setzen (z.B. Praktikum, Wahlbereiche, Beifach).<br>... <i>independently refining one's profile and setting priorities (e.g. internship, electives, minor)...</i> |
| Soz_Anforderung_5                     | ... soziologische Fachliteratur zu lesen.<br>... <i>reading sociological technical literature...</i>                                                                                                                          |

## 2. Expectation Check of the Bachelor's Program in Economic and Business Education

|                                            |                                                                                                                                                                                                                                                                                                                                                                                                                                                                                                                                                                                                                                                                                                                                                                                          |                                                                                                                                        |
|--------------------------------------------|------------------------------------------------------------------------------------------------------------------------------------------------------------------------------------------------------------------------------------------------------------------------------------------------------------------------------------------------------------------------------------------------------------------------------------------------------------------------------------------------------------------------------------------------------------------------------------------------------------------------------------------------------------------------------------------------------------------------------------------------------------------------------------------|----------------------------------------------------------------------------------------------------------------------------------------|
| Instruktion<br><i>Instruction</i>          | <p>Der folgende Fragebogen besteht aus einer Liste mit verschiedenen Studieninhalten und Studienanforderungen, die in unterschiedlichem Ausmaß Bestandteil des Bachelorstudiengangs Wirtschaftspädagogik sind.<br/>Geben Sie bitte für jeden Studieninhalt und jede Studienanforderung an, in welchem zeitlichen Ausmaß sie diese/n in Bezug auf die gesamte Bachelorstudienzeit erwarten.</p> <p><i>The following questionnaire consists of a list of various study content and study requirements that are part of the Bachelor's program in Economic and Business Education to varying degrees.<br/>For each study content and study requirement, please indicate to what extent in terms of the time you expect this/these to be part of the entire bachelor's study period.</i></p> |                                                                                                                                        |
| Itemstamm<br><i>item stem</i>              | <p>In welchem zeitlichen Ausmaß erwarten Sie, sich im Bachelorstudiengang Wirtschaftspädagogik damit zu beschäftigen ...<br/><i>To what extent do you expect to deal with ... in your Bachelor's Program in Economic and Business Education</i></p>                                                                                                                                                                                                                                                                                                                                                                                                                                                                                                                                      |                                                                                                                                        |
| Antwortoptionen<br><i>Response options</i> | <p>Geschlossen, 6-stufig</p> <p>1 = gar nicht<br/>2 = in einem sehr geringen zeitlichen Ausmaß<br/>3 = in einem geringen zeitlichen Ausmaß<br/>4 = in einem mittleren zeitlichen Ausmaß<br/>5 = in einem großen zeitlichen Ausmaß<br/>6 = in einem sehr großen zeitlichen Ausmaß</p>                                                                                                                                                                                                                                                                                                                                                                                                                                                                                                     | <p>1 = not at all<br/>2 = very low extent<br/>3 = low extent<br/>4 = average extent<br/>5 = large extent<br/>6 = very large extent</p> |

| Analysis                                                                                     |                                                                                                                                                                                                                                                                                                                                   |
|----------------------------------------------------------------------------------------------|-----------------------------------------------------------------------------------------------------------------------------------------------------------------------------------------------------------------------------------------------------------------------------------------------------------------------------------|
| Variablenname<br><i>Variable name</i>                                                        | Wortlaut<br><i>Item wording</i>                                                                                                                                                                                                                                                                                                   |
| WP_CC301_1                                                                                   | <p>... zu lernen, wozu bestimmte mathematische Modelle benötigt werden, wie man durch sie theoretische Fragen beantworten und auch praktische Aufgaben lösen kann.<br/><i>... learning what certain mathematical models are needed for, how they can be used to answer theoretical questions and solve practical tasks...</i></p> |
| WP_CC301_2                                                                                   | <p>... grundlegende mathematische Fähigkeiten zu erwerben, die in der Analyse quantitativer Probleme benötigt werden, bspw. Matrizen, Vektoralgebra.<br/><i>... acquiring basic mathematical skills needed in the analysis of quantitative problems, e.g., matrices, vector algebra...</i></p>                                    |
| Betriebspraktische Studien (Akademischer Teil)<br>practical business studies (academic part) |                                                                                                                                                                                                                                                                                                                                   |
| Variablenname<br><i>Variable name</i>                                                        | Wortlautschärf<br><i>Item wording</i>                                                                                                                                                                                                                                                                                             |
| WP_BP_Stud_1                                                                                 | <p>... welche Strukturen und Aufgaben dem Personalbereich in einer Organisation zuzuordnen sind.<br/><i>... which structures and tasks are to be allocated to the personnel area in an organization...</i></p>                                                                                                                    |
| WP_BP_Stud_2                                                                                 | <p>... wie man seine Erfahrungen aus der betrieblichen Praxis anhand theoretischer Studieninhalte reflektiert.<br/><i>... how to reflect on one's experiences in operational practice based on theoretical study content...</i></p>                                                                                               |

| Bildungsmanagement 1: Berufsausbildung<br><i>educational management 1: vocational training</i>                           |                                                                                                                                                                                                                                                                                                                                                                                                                                                                                                                            |
|--------------------------------------------------------------------------------------------------------------------------|----------------------------------------------------------------------------------------------------------------------------------------------------------------------------------------------------------------------------------------------------------------------------------------------------------------------------------------------------------------------------------------------------------------------------------------------------------------------------------------------------------------------------|
| Variablenname<br><i>Variable name</i>                                                                                    | Wortlaut<br><i>Item wording</i>                                                                                                                                                                                                                                                                                                                                                                                                                                                                                            |
| WP_BM1_BA_1                                                                                                              | ... welche rechtlichen Bestimmungen für die Berufsausbildung gelten (z.B. Berufsbildungsgesetz, Jugendarbeitsschutzgesetz, ...).<br><i>... which legal provisions apply to vocational training (e.g. Vocational Training Act, Youth Employment Protection Act, ...)...</i>                                                                                                                                                                                                                                                 |
| WP_BM1_BA_2                                                                                                              | ... wie eine berufliche Ausbildung strukturiert ist, welchen Stellenwert sie hat und wer die Beteiligten (Ausbilder, Lehrkräfte, Kammern, Unternehmen) sind.<br><i>... how vocational training is structured, what significance it has and who the parties involved are (trainers, teachers, chambers, companies)...</i>                                                                                                                                                                                                   |
| Bildungsmanagement 2: Weiterbildung<br><i>educational management 2: further training</i>                                 |                                                                                                                                                                                                                                                                                                                                                                                                                                                                                                                            |
| Variablenname<br><i>Variable name</i>                                                                                    | Wortlaut<br><i>Item wording</i>                                                                                                                                                                                                                                                                                                                                                                                                                                                                                            |
| WP_BM2_WB_1                                                                                                              | ... wie man berufliche Weiterbildungsangebote plant und evaluiert.<br><i>... how to plan and evaluate professional development opportunities...</i>                                                                                                                                                                                                                                                                                                                                                                        |
| WP_BM2_WB_2                                                                                                              | ... welche Relevanz die Weiterbildung von MitarbeiterInnen aus individueller, unternehmerischer und gesellschaftlicher Perspektive hat.<br><i>... the relevance of employee training from an individual, corporate and societal perspective...</i>                                                                                                                                                                                                                                                                         |
| Bildungsmanagement 3: Lernkultur in Organisationen<br><i>educational management 3: learning culture in organizations</i> |                                                                                                                                                                                                                                                                                                                                                                                                                                                                                                                            |
| Variablenname<br><i>Variable name</i>                                                                                    | Wortlaut<br><i>Item wording</i>                                                                                                                                                                                                                                                                                                                                                                                                                                                                                            |
| WP_BM3_LK_1                                                                                                              | ... wie eine Lernkultur* positiv beeinflusst und evaluiert werden kann.<br><i>... how to positively influence and evaluate a learning culture*...</i>                                                                                                                                                                                                                                                                                                                                                                      |
| WP_BM3_LK_2                                                                                                              | ... was eine Lernkultur* beinhaltet und welchen Einfluss sie auf das Lernen in Organisationen hat (z.B. Schule, Unternehmen, ...).<br><i>... what a learning culture* entails and what influence it has on learning in organizations (e.g. school, company, ...)...</i>                                                                                                                                                                                                                                                    |
| Bürgerliches Recht, Handels- und Gesellschaftsrecht<br><i>civil law, commercial law, corporate law</i>                   |                                                                                                                                                                                                                                                                                                                                                                                                                                                                                                                            |
| Variablenname<br><i>Variable name</i>                                                                                    | Wortlaut<br><i>Item wording</i>                                                                                                                                                                                                                                                                                                                                                                                                                                                                                            |
| WP_LAW301_1                                                                                                              | ... anhand des Bürgerlichen Gesetzbuches einen Überblick über die Rechtsbeziehungen zwischen Privatpersonen vor allem bei der Eingehung, Erfüllung und insbesondere auch der pflichtwidrigen Verletzung von Vertragsverhältnissen zu erhalten.<br><i>... getting an overview of the legal relations between private persons on the basis of the Civil Code, especially in the case of entering into, fulfilling and breaching contractual relations...</i>                                                                 |
| WP_LAW_302_1                                                                                                             | ... welche Personen es im Handelsverkehr gibt (Kaufleute, Aktiengesellschaft, GmbH) und welche rechtlichen Besonderheiten für diese gelten, z.B. Rechte bei einem Kauf von Mangelware bei einem Händler versus bei einer Privatperson.<br><i>... which persons exist in commercial transactions (merchants, joint-stock companies, limited liability companies) and which legal peculiarities apply to them, e.g., rights in the case of a purchase of defective goods from a merchant versus from a private person...</i> |

|                                                                                                |                                                                                                                                                                                                                                                                           |
|------------------------------------------------------------------------------------------------|---------------------------------------------------------------------------------------------------------------------------------------------------------------------------------------------------------------------------------------------------------------------------|
| WP_LAW301_302_2                                                                                | ... wie man ein juristisches Gutachten schreibt.<br>... <i>how to write a legal opinion...</i>                                                                                                                                                                            |
| Einführung in die Bildungspsychologie<br><i>introduction to educational psychology</i>         |                                                                                                                                                                                                                                                                           |
| Variablenname<br><i>Variable name</i>                                                          | Wortlaut<br><i>Item wording</i>                                                                                                                                                                                                                                           |
| WP_BilPsy_1                                                                                    | ... wie menschliches Lernen und das Gedächtnis funktionieren.<br>... <i>how human learning and memory work...</i>                                                                                                                                                         |
| WP_BilPsy_2                                                                                    | ... wie man die Qualität von Unterricht beschreiben und mit dem Lernerfolg von Schüler*innen in Beziehung setzen kann.<br>... <i>how to describe instructional quality and relate it to students' learning success...</i>                                                 |
| Einführung in die Pädagogische Psychologie<br><i>introduction to educational psychology</i>    |                                                                                                                                                                                                                                                                           |
| Variablenname<br><i>Variable name</i>                                                          | Wortlaut<br><i>Item wording</i>                                                                                                                                                                                                                                           |
| WP_PaedPsyc_1                                                                                  | ... wie Bildungs- und Erziehungsprozesse beschrieben und verbessert werden können.<br>... <i>how educational processes can be described and improved...</i>                                                                                                               |
| WP_PaedPsyc_2                                                                                  | ... was Lernende motiviert und wie die Motivation gefördert werden kann.<br>... <i>what motivates students and how motivation can be enhanced...</i>                                                                                                                      |
| Lern- und Arbeitsstrategien<br><i>learning and working strategies</i>                          |                                                                                                                                                                                                                                                                           |
| Variablenname<br><i>Variable name</i>                                                          | Wortlaut<br><i>Item wording</i>                                                                                                                                                                                                                                           |
| WP_LuAS_1                                                                                      | ... welche Vor- und Nachteile verschiedene Lern- und Arbeitsstrategien (z. B. Wiederholen, Auswendiglernen, Elaborieren) haben.<br>... <i>the advantages and disadvantages of different learning and working strategies (e.g., repeating, memorizing, elaborating)...</i> |
| WP_LuAS_2                                                                                      | ... wie in der Wirtschaftspädagogik wissenschaftlich gearbeitet wird (wie man forscht, wissenschaftlich schreibt, ...).<br>... <i>how scholarly work is done in business education (how to do research, write scientifically, ...)...</i>                                 |
| Schulpraktische Studien (Akademischer Teil)<br><i>practical school studies (academic part)</i> |                                                                                                                                                                                                                                                                           |
| Variablenname<br><i>Variable name</i>                                                          | Wortlaut<br><i>Item wording</i>                                                                                                                                                                                                                                           |
| WP_SP_Stud_1                                                                                   | ... Unterrichtseinheiten zu planen, durchzuführen und zu reflektieren.<br>... <i>planning, conducting, and reflecting on teaching units...</i>                                                                                                                            |
| WP_SP_Stud_2                                                                                   | ... auf welche Merkmale und Inhalte bei der Planung und Beobachtung von Unterricht zu achten ist.<br>... <i>what characteristics and content to consider when planning and observing lessons...</i>                                                                       |
| Unternehmensethik<br><i>business ethics</i>                                                    |                                                                                                                                                                                                                                                                           |
| Variablenname                                                                                  | Wortlaut                                                                                                                                                                                                                                                                  |



|                                                                                                    |                                                                                                                                                                                                                                                                                                                     |
|----------------------------------------------------------------------------------------------------|---------------------------------------------------------------------------------------------------------------------------------------------------------------------------------------------------------------------------------------------------------------------------------------------------------------------|
| <i>Variable name</i>                                                                               | <i>Item wording</i>                                                                                                                                                                                                                                                                                                 |
| WP_UE_1                                                                                            | ... grundlegende ethische Theorien kennenzulernen z.B. den Utilitarismus, der den moralischen Wert einer Handlung anhand ihrer Folgen bemisst.<br>... <i>learning about basic ethical theories, e.g., utilitarianism, which measures the moral value of an action by its consequences...</i>                        |
| WP_UE_2                                                                                            | ... sich mit dem Zusammenhang zwischen Ethik und Wirtschaft zu befassen z.B. mit der Frage, ob die Verteilung von Gütern im Kapitalismus gerecht erfolgt.<br>... <i>the connection between ethics and economy, e.g., with the question of whether the distribution of goods in capitalism is fair.</i>              |
| Verarbeitung von Forschungsdaten<br><i>data processing in research</i>                             |                                                                                                                                                                                                                                                                                                                     |
| Variablenname<br><i>Variable name</i>                                                              | Wortlaut<br><i>Item wording</i>                                                                                                                                                                                                                                                                                     |
| WP_Forsch_1                                                                                        | ... wie man Ergebnisse statistischer Analysen* richtig interpretiert.<br>... <i>how to properly interpret results of statistical analyses*...</i>                                                                                                                                                                   |
| WP_Forsch_2                                                                                        | ... wie man im Forschungsprozess Daten erhebt (z.B. durch schriftliche Befragungen) und statistisch auswertet (mit spezieller Software z.B. SPSS).<br>... <i>how to collect data in the research process (e.g., through written surveys) and analyze it statistically (using specialized software, e.g., SPSS).</i> |
| Wirtschaftspädagogik Grundlagen<br><i>business education fundamentals</i>                          |                                                                                                                                                                                                                                                                                                                     |
| Variablenname<br><i>Variable name</i>                                                              | Wortlaut<br><i>Item wording</i>                                                                                                                                                                                                                                                                                     |
| WP_GWP_1                                                                                           | ... welche Zielsetzungen, Problemstellungen und Anwendungskontexte die Wirtschaftspädagogik ausmachen (z.B. Unterricht, Lernen im Unternehmen, E-Learning).<br>... <i>what objectives, problems, and contexts of application constitute business education (e.g., teaching, corporate learning, e-learning)...</i>  |
| WP_GWP_2                                                                                           | ... wie die Wirtschaftspädagogik historisch entstanden ist und sich entwickelt hat.<br>... <i>how business education has historically emerged and developed...</i>                                                                                                                                                  |
| Wirtschaftsberufliche Kompetenzentwicklung 1<br><i>business education competence development 1</i> |                                                                                                                                                                                                                                                                                                                     |
| Variablenname<br><i>Variable name</i>                                                              | Wortlaut<br><i>Item wording</i>                                                                                                                                                                                                                                                                                     |
| WP_WB_Komp1_1                                                                                      | ... wie man berufliche Kompetenzen* messen kann.<br>... <i>how to measure professional competencies*...</i>                                                                                                                                                                                                         |
| WP_WB_Komp1_2                                                                                      | ... was man unter beruflichen Kompetenzen versteht.<br>... <i>what is meant by professional competencies...</i>                                                                                                                                                                                                     |
| Wirtschaftsberufliche Kompetenzentwicklung 2<br><i>business education competence development 2</i> |                                                                                                                                                                                                                                                                                                                     |
| Variablenname<br><i>Variable name</i>                                                              | Wortlaut<br><i>Item wording</i>                                                                                                                                                                                                                                                                                     |
| WP_WB_Komp2_1                                                                                      | ... wie Lernen funktioniert und wodurch Lernen beeinflusst wird.<br>... <i>how learning works and what influences learning...</i>                                                                                                                                                                                   |

|                                                      |                                                                                                                                                                                                                                                                                           |
|------------------------------------------------------|-------------------------------------------------------------------------------------------------------------------------------------------------------------------------------------------------------------------------------------------------------------------------------------------|
| WP_WB_Komp2_2                                        | ... wie Kompetenz in unterschiedlichen Bereichen (z.B. Schule, Betrieb) gefördert werden kann.<br>... <i>how competence can be promoted in different areas (e.g. school, company).</i>                                                                                                    |
| Mikroökonomik A<br><i>microeconomics A</i>           |                                                                                                                                                                                                                                                                                           |
| Variablenname<br><i>Variable name</i>                | Wortlaut<br><i>Item wording</i>                                                                                                                                                                                                                                                           |
| WP_ECO302_1                                          | ... wie Marktpreise durch Wettbewerb entstehen.<br>... <i>how market prices are determined by competition...</i>                                                                                                                                                                          |
| WP_ECO302_2                                          | ... wie sich Märkte gegenseitig beeinflussen.<br>... <i>how markets influence each other.</i>                                                                                                                                                                                             |
| Produktion<br><i>production</i>                      |                                                                                                                                                                                                                                                                                           |
| Variablenname<br><i>Variable name</i>                | Wortlaut<br><i>Item wording</i>                                                                                                                                                                                                                                                           |
| WP_OPM301_1                                          | ... die typischen Herausforderungen von Produktion und Logistik kennenzulernen (Produktions- und Transportplanung, Bestandsmanagement).<br>... <i>learning about the typical challenges of production and logistics (production and transportation planning, inventory management)...</i> |
| WP_OPM301_2                                          | ... Entscheidungsprobleme und ihre Komponenten (Ziele, Bedingungen, Entscheidungen) zu beschreiben und mathematisch gute Lösungen zu finden.<br>... <i>describing decision problems and their components (goals, conditions, choices) and finding mathematically good solutions...</i>    |
| Quantitative Methoden<br><i>quantitative methods</i> |                                                                                                                                                                                                                                                                                           |
| Variablenname<br><i>Variable name</i>                | Wortlaut<br><i>Item wording</i>                                                                                                                                                                                                                                                           |
| WP_QM_1                                              | ... Entscheidungsprobleme aus der Praxis mathematisch mit Hilfe von Algorithmen zu lösen.<br>... <i>solving real-world decision problems mathematically using algorithms...</i>                                                                                                           |
| WP_QM_2                                              | ... die lineare Algebra (z.B. das Rechnen mit Matrizen) zu vertiefen und deren betriebswirtschaftliche Anwendung kennenzulernen.<br>... <i>deepen your knowledge of linear algebra (e.g., calculating with matrices) and to learn about its business application...</i>                   |

|                                       |                                                                                                                                                                                                                                                                                                                 |
|---------------------------------------|-----------------------------------------------------------------------------------------------------------------------------------------------------------------------------------------------------------------------------------------------------------------------------------------------------------------|
| Statistik<br><i>statistics</i>        |                                                                                                                                                                                                                                                                                                                 |
| Variablenname<br><i>Variable name</i> | Wortlaut<br><i>Item wording</i>                                                                                                                                                                                                                                                                                 |
| WP_CC304_1                            | .. die Grundlagen der Wahrscheinlichkeitsrechnung zu erlernen (z.B. bedingte Wahrscheinlichkeiten, Berechnungen mit Zufallsvariablen, Erwartungswerte).<br>... <i>learning the fundamentals of probability theory (e.g., conditional probabilities, calculations with random variables, expected values)...</i> |
| WP_CC304_2                            | ... die Grundkonzepte des Umgangs mit zufalls behafteten Beobachtungen kennenzulernen und statistische Entscheidungsverfahren (Tests) anzuwenden.<br>... <i>learning the basic concepts of dealing with random observations and applying statistical decision procedures (tests)...</i>                         |

| Wirtschaftsinformatik<br><i>business informatics</i>  |                                                                                                                                                                                                                                                                                                                                                                                                                                                                                                             |
|-------------------------------------------------------|-------------------------------------------------------------------------------------------------------------------------------------------------------------------------------------------------------------------------------------------------------------------------------------------------------------------------------------------------------------------------------------------------------------------------------------------------------------------------------------------------------------|
| Variablenname<br><i>Variable name</i>                 | Wortlaut<br><i>Item wording</i>                                                                                                                                                                                                                                                                                                                                                                                                                                                                             |
| WP_WI_1                                               | ... wie und wofür betriebliche Informationssysteme* in Firmen eingesetzt werden z.B. zur Beschleunigung von Betriebsprozessen oder zur Erleichterung der Planung.<br><i>... how and for what purpose business information systems* are used in companies, e.g., to speed up operational processes or to facilitate planning...</i>                                                                                                                                                                          |
| WP_dupl1_WI_2                                         | ... den Umgang mit Datenbanken (z.B. SQL) zu erlernen.<br><i>... learning how to use databases (e.g., SQL)...</i>                                                                                                                                                                                                                                                                                                                                                                                           |
| Internes Rechnungswesen<br><i>internal accounting</i> |                                                                                                                                                                                                                                                                                                                                                                                                                                                                                                             |
| Variablenname<br><i>Variable name</i>                 | Wortlaut<br><i>Item wording</i>                                                                                                                                                                                                                                                                                                                                                                                                                                                                             |
| WP_IRW_1                                              | ... Ansätze, Methoden und Techniken zur Ermittlung von in Unternehmen anfallenden Kosten zu erlernen und diese Kosten einzelnen Kostenträgern (z.B. einem Produkt wie einem Computer) zuzuordnen.<br><i>... learning approaches, methods, and techniques for determining costs incurred in companies and assigning those costs to individual cost objects (e.g., a product such as a computer)...</i>                                                                                                       |
| WP_IRW_2                                              | ... wie man feststellt, ob ein Produkt (z. B. Computer) profitabel ist, in dem anfallende Einzelkosten (z. B. Materialkosten für den Computer) und Gemeinkosten (z. B. für die Personalabteilung, Miete) von den Erlösen des Produkts abgezogen werden.<br><i>... how to determine whether a product (e.g., computer) is profitable by subtracting direct costs incurred (e.g., cost of materials for the computer) and overhead costs (e.g., for human resources, rent) from the product's revenues...</i> |
| Management<br><i>management</i>                       |                                                                                                                                                                                                                                                                                                                                                                                                                                                                                                             |
| Variablenname<br><i>Variable name</i>                 | Wortlaut<br><i>Item wording</i>                                                                                                                                                                                                                                                                                                                                                                                                                                                                             |
| WP_MGMT_1                                             | ... was Unternehmen sind und wie diese geführt werden.<br><i>... what companies are and how they are run...</i>                                                                                                                                                                                                                                                                                                                                                                                             |
| WP_MGMT_2                                             | ... wie aktuelle Herausforderungen (z.B. Globalisierung, Digitalisierung, Klimawandel) den Managementprozess von Unternehmen (z.B. Planung und Personal) beeinflussen.<br><i>... how current challenges (e.g. globalization, digitalization, climate change) influence the management process of companies (e.g. planning and personnel)...</i>                                                                                                                                                             |
| Marketing<br><i>marketing</i>                         |                                                                                                                                                                                                                                                                                                                                                                                                                                                                                                             |
| Variablenname<br><i>Variable name</i>                 | Wortlaut<br><i>Item wording</i>                                                                                                                                                                                                                                                                                                                                                                                                                                                                             |
| WP_MKT_1                                              | ... wie Unternehmen ihre Produkte effektiv vermarkten können.<br><i>... how companies can effectively market their products...</i>                                                                                                                                                                                                                                                                                                                                                                          |
| WP_MKT_2                                              | ... wie Konsumenten sich im Kaufprozess verhalten.                                                                                                                                                                                                                                                                                                                                                                                                                                                          |

|                                                                          |                                                                                                                                                                        |
|--------------------------------------------------------------------------|------------------------------------------------------------------------------------------------------------------------------------------------------------------------|
|                                                                          | ... how consumers behave in the buying process...                                                                                                                      |
| Externes Rechnungswesen<br><i>external accounting</i>                    |                                                                                                                                                                        |
| Variablenname<br><i>Variable name</i>                                    | Wortlaut<br><i>Item wording</i>                                                                                                                                        |
| WP_ERW_1                                                                 | ... das System der doppelten Buchführung* kennenzulernen und anzuwenden.<br>... <i>learning about and applying the double-entry bookkeeping*</i> ...                   |
| WP_ERW_2                                                                 | ... zu lernen, was eine Bilanz ist.<br>... <i>learning what a balance sheet is...</i>                                                                                  |
| Finanzwirtschaft<br><i>finance</i>                                       |                                                                                                                                                                        |
| Variablenname<br><i>Variable name</i>                                    | Wortlaut<br><i>Item wording</i>                                                                                                                                        |
| WP_FiWi_1                                                                | ... wie Unternehmen und Privatpersonen finanzielle Entscheidungen treffen (sollten).<br>... <i>how businesses and individuals (should) make financial decisions...</i> |
| WP_FiWi_2                                                                | ... wie Finanzmärkte funktionieren.<br>... <i>how financial markets work ...</i>                                                                                       |
| WP_FiWi_3                                                                | ... wie Risiken den Preis von Wertpapieren (z.B. Aktien) beeinflussen.<br>... <i>how risk affects the price of securities (e.g., stocks)...</i>                        |
| Finanzmathematik<br><i>mathematical finance</i>                          |                                                                                                                                                                        |
| Variablenname<br><i>Variable name</i>                                    | Wortlaut<br><i>Item wording</i>                                                                                                                                        |
| WP_FiMa_1                                                                | ... den Verlauf von Sparprozessen darzustellen.<br>... <i>illustrating the progression of savings processes...</i>                                                     |
| WP_FiMa_2                                                                | ... wie man einen aufgenommenen Kredit zurückbezahlt (tilgt).<br>... <i>how to pay back (repay) a loan..</i>                                                           |
| WP_FiMa_3                                                                | ... wie man Preise von Finanztiteln (z.B. Aktien) bestimmt.<br>... <i>how to determine prices of financial securities (e.g., stocks)...</i>                            |
| WP_FiMa_4                                                                | ... wie man den jährlichen Ertrag von Investitionen berechnet.<br>... <i>how to calculate the annual return on investment...</i>                                       |
| Grundlagen der Volkswirtschaftslehre<br><i>fundamentals of economics</i> |                                                                                                                                                                        |
| Variablenname<br><i>Variable name</i>                                    | Wortlaut<br><i>Item wording</i>                                                                                                                                        |
| WP_ECO301_1                                                              | ... wie unser Wirtschaftssystem funktioniert.<br>... <i>how our economic system works...</i>                                                                           |

|                                       |                                                                                                                                                                                                                                                                                             |
|---------------------------------------|---------------------------------------------------------------------------------------------------------------------------------------------------------------------------------------------------------------------------------------------------------------------------------------------|
| WP_ECO301_2                           | ... wie unser Staat auf das wirtschaftliche Geschehen Einfluss nehmen kann und welche potenziellen Grenzen und Konsequenzen diese Einflussnahme haben kann.<br>... <i>how our government can influence economic activity and the potential limits and consequences of that influence...</i> |
| Besonderheiten<br><i>specifics</i>    |                                                                                                                                                                                                                                                                                             |
| Variablenname<br><i>Variable name</i> | Wortlaut<br><i>Item wording</i>                                                                                                                                                                                                                                                             |
| WP_Bes_MA_1                           | ... betriebswirtschaftliche Grundlagen kennenzulernen (z.B. im Marketing, Management, externen und internen Rechnungswesen).<br>... <i>learning about business fundamentals (e.g., marketing, management, external and internal accounting)...</i>                                          |
| WP_Bes_MA_2                           | ... Methoden und Befunde der empirischen Lehr-/Lernforschung (statistische Verfahren, Interpretieren von Statistiken) kennenzulernen.<br>... <i>learning about methods and findings of empirical teaching/learning research (statistical procedures, interpreting statistics)...</i>        |
| WP_Bes_MA_3                           | ... pädagogische Grundlagen und aktuelle Fragestellungen der Pädagogik kennenzulernen.<br>... <i>learning about pedagogical principles and current issues in pedagogy...</i>                                                                                                                |
| WP_Bes_MA_4                           | ... Handlungs- und Methodenkompetenz im Umgang in schwierigen Situationen zu erwerben.<br>... <i>acquiring action and methodological skills in dealing with difficult situations...</i>                                                                                                     |
| WP_Bes_MA_5                           | ... psychische Störungen und ihre Behandlung kennenzulernen.<br>... <i>learning about mental disorders and their treatment...</i>                                                                                                                                                           |
| WP_Bes_MA_6                           | ... Kenntnisse im Bereich Krisenintervention und Konfliktberatung zu erwerben.<br>... <i>acquiring knowledge in the area of crisis intervention and conflict counseling...</i>                                                                                                              |
| WP_Bes_MA_7                           | ... zu lernen, wie man guten Unterricht gestalten und durchführen kann.<br>... <i>learning how to design and conduct good lessons...</i>                                                                                                                                                    |

|                                       |                                                                                                                                                                                                                                                    |
|---------------------------------------|----------------------------------------------------------------------------------------------------------------------------------------------------------------------------------------------------------------------------------------------------|
| Anforderungen<br><i>requirements</i>  |                                                                                                                                                                                                                                                    |
| Variablenname<br><i>Variable name</i> | Wortlaut<br><i>Item wording</i>                                                                                                                                                                                                                    |
| WiPaed_<br>Anforderung 1              | ... wissenschaftliche Arbeiten zu verfassen (z.B. Hausarbeiten, Projektberichte, Bachelorarbeit).<br>... <i>writing academic papers (e.g., term papers, project reports, bachelor's thesis)...</i>                                                 |
| WiPaed_<br>Anforderung 2              | ... Diskussionen mit DozentInnen und KommilitonInnen in englischer Sprache zu führen.<br>... <i>being involved in having discussions with lecturers and fellow students in English...</i>                                                          |
| WiPaed_<br>Anforderung 3              | ... sich mit englischer Fachliteratur auseinanderzusetzen.<br>... <i>dealing with English technical literature.</i>                                                                                                                                |
| WiPaed_<br>Anforderung 5              | ... in Kleingruppen eigenverantwortlich an Aufgaben oder Projekten zu arbeiten.<br>... <i>working independently in small groups on tasks or projects...</i>                                                                                        |
| WiPaed_<br>Anforderung 6              | ... weiterführende mathematische Kenntnisse zu erlernen und anzuwenden (z.B. Analysis, Statistik, Quantitative Methoden).<br>... <i>learning and applying advanced mathematical skills (e.g., analysis, statistics, quantitative methods)...</i>   |
| WiPaed_<br>Anforderung 7              | ... sein Wissen in verschiedenen Kontexten zu präsentieren und zu diskutieren (Schulpraktikum, in Kleingruppen, ...).<br>... <i>presenting and discussing one's knowledge in different contexts (internship in schools, in small groups, ...).</i> |

|                           |                                                                                                                                                                                                      |
|---------------------------|------------------------------------------------------------------------------------------------------------------------------------------------------------------------------------------------------|
| WiPaed_<br>Anforderung 8  | ... sich im Rahmen eines Nebenfachs mit dessen Grundlagen und aktuellen Forschungsfeldern auseinanderzusetzen.<br>... <i>dealing with the fundamentals and current research fields of a minor...</i> |
| WiPaed_<br>Anforderung 9  | ... im schulischen und betrieblichen Rahmen praktische Erfahrungen zu machen.<br>... <i>gaining practical experience in school and company settings...</i>                                           |
| WiPaed_<br>Anforderung 10 | ... wirtschaftspädagogische Fachliteratur zu lesen.<br>... <i>reading business education technical literature...</i>                                                                                 |

### 3. Expectation Check for the Integrated LL.B. and State Examination Program in Law

|                                         |                                                                                                                                                                                                                                                                                                                                                                                                                                                                                                                                                                                                                                                                                                                                                                                               |                                                                                                                                        |
|-----------------------------------------|-----------------------------------------------------------------------------------------------------------------------------------------------------------------------------------------------------------------------------------------------------------------------------------------------------------------------------------------------------------------------------------------------------------------------------------------------------------------------------------------------------------------------------------------------------------------------------------------------------------------------------------------------------------------------------------------------------------------------------------------------------------------------------------------------|----------------------------------------------------------------------------------------------------------------------------------------|
| Instruktion<br><i>Instruction</i>       | <p>Der folgende Fragebogen besteht aus einer Liste mit verschiedenen Studieninhalten und Studienanforderungen, die in unterschiedlichem Ausmaß Bestandteil des Kombinationsstudiengangs Unternehmensjurist/in sind.<br/>Geben Sie bitte für jeden Studieninhalt und jede Studienanforderung an, in welchem zeitlichen Ausmaß sie diese/n in Bezug auf die gesamte Bachelorstudienzeit erwarten.</p> <p><i>The following questionnaire consists of a list of various study content and study requirements that are part of the Integrated LL.B. and State Examination Program in Law to varying degrees.<br/>For each study content and study requirement, please indicate to what extent in terms of the time you expect this/these to be part of the entire bachelor's study period.</i></p> |                                                                                                                                        |
| Itemstamm<br><i>item stem</i>           | <p>In welchem zeitlichen Ausmaß erwarten Sie, sich im Bachelorstudiengang Wirtschaftspädagogik damit zu beschäftigen ...<br/><i>To what extent do you expect to deal with ... in your Bachelor's Program in Economic and Business Education</i></p>                                                                                                                                                                                                                                                                                                                                                                                                                                                                                                                                           |                                                                                                                                        |
| Antwortformat<br><i>Response format</i> | <p>Geschlossen, 6-stufig</p> <p>1 = gar nicht<br/>2 = in einem sehr geringen zeitlichen Ausmaß<br/>3 = in einem geringen zeitlichen Ausmaß<br/>4 = in einem mittleren zeitlichen Ausmaß<br/>5 = in einem großen zeitlichen Ausmaß<br/>6 = in einem sehr großen zeitlichen Ausmaß</p>                                                                                                                                                                                                                                                                                                                                                                                                                                                                                                          | <p>1 = not at all<br/>2 = very low extent<br/>3 = low extent<br/>4 = average extent<br/>5 = large extent<br/>6 = very large extent</p> |

| Zivilrecht 1<br><i>civil law 1</i>    |                                                                                                                                                                                                                                                                                                        |
|---------------------------------------|--------------------------------------------------------------------------------------------------------------------------------------------------------------------------------------------------------------------------------------------------------------------------------------------------------|
| Variablenname<br><i>Variable name</i> | Wortlaut<br><i>Item wording</i>                                                                                                                                                                                                                                                                        |
| UJU_Zivilrecht1_1                     | ... wie man ein juristisches Gutachten schreibt.<br><i>... how to write a legal opinion...</i>                                                                                                                                                                                                         |
| UJU_Zivilrecht1_2                     | ... wie Verträge geschlossen werden.<br><i>... how contracts are concluded...</i>                                                                                                                                                                                                                      |
| UJU_Zivilrecht1_3                     | ... wann auch ohne vertragliche Beziehung zwischen den Beteiligten Schadensersatz geleistet werden muss, z. B. im Falle eines Autounfalls.<br><i>... when compensation must be paid even in the absence of a contractual relationship between the parties, e.g., in the event of a car accident...</i> |
| UJU_Zivilrecht1_4                     | ... wie man ein Gesetz auf eine Alltagssituation anwendet.<br><i>... how to apply a law to an everyday situation...</i>                                                                                                                                                                                |
| Zivilrecht 2<br><i>civil law 2</i>    |                                                                                                                                                                                                                                                                                                        |
| Variablenname<br><i>Variable name</i> | Wortlaut<br><i>Item wording</i>                                                                                                                                                                                                                                                                        |
| UJU_Zivilrecht2_1                     | ... welche Gewährleistungsansprüche bei Kauf- und Werkverträgen bestehen.                                                                                                                                                                                                                              |

|                                                        |                                                                                                                                                                                                                                                                                |
|--------------------------------------------------------|--------------------------------------------------------------------------------------------------------------------------------------------------------------------------------------------------------------------------------------------------------------------------------|
|                                                        | ... <i>what warranty claims exist for purchase and work contracts...</i>                                                                                                                                                                                                       |
| UJU_Zivilrecht2_2                                      | ... wie man Dritte in Verträge miteinbezieht z. B., wenn mehrere Personen auf Schadensersatz haften.<br>... <i>how to involve third parties in contracts, e.g., when more than one person is liable for damages...</i>                                                         |
| UJU_Zivilrecht2_3                                      | ... was passiert, wenn ein Vertrag nicht pflichtgemäß erfüllt wird.<br>... <i>what happens if a contract is not dutifully performed...</i>                                                                                                                                     |
| UJU_Zivilrecht2_4                                      | ... wie das Zivilrecht sich historisch entwickelt hat.<br>... <i>how civil law has evolved historically ...</i>                                                                                                                                                                |
| UJU_Zivilrecht2_5                                      | ... welche Rechte Verbraucher haben z.B., wenn man bei einem Unternehmer einen PC für den privaten Gebrauch kauft (z. B. Widerruf, Garantie).<br>... <i>the rights of consumers, e.g., when buying a PC for private use from an entrepreneur (e.g., revocation, warranty).</i> |
| Zivilrecht 3<br>civil law 3                            |                                                                                                                                                                                                                                                                                |
| Variablenname<br><i>Variable name</i>                  | Wortlaut<br><i>Item wording</i>                                                                                                                                                                                                                                                |
| UJU_Zivilrecht3_1                                      | ... wie man erb- und familienrechtliche Probleme lösen kann z.B. Ehevertrag und Gestaltung des Testaments.<br>... <i>how to solve inheritance and family law problems, e.g., prenuptial agreement and drafting of the will...</i>                                              |
| UJU_Zivilrecht3_2                                      | ... welche Ausgleichsansprüche außerhalb von Verträgen bestehen z.B. Rückbuchung bei einer Falschüberweisung.<br>... <i>what compensation claims exist outside of contracts, e.g., chargeback in the event of an incorrect transfer...</i>                                     |
| UJU_Zivilrecht3_3                                      | ... wie Eigentum an Sachen und Grundstücken erworben und übertragen wird.<br>... <i>how ownership of property and land is acquired and transferred...</i>                                                                                                                      |
| UJU_Zivilrecht3_4                                      | ... welches Recht in grenzüberschreitenden Fällen angewendet wird z.B. bei Vertrag zwischen einem deutschen und einem italienischen Unternehmen.<br>... <i>which law is applied in cross-border cases, e.g., contract between a German and an Italian company...</i>           |
| UJU_Zivilrecht3_5                                      | ... wie besondere Vertragstypen abgeschlossen werden (z.B. Miet-, Dienst- oder Darlehensverträge usw.) und wie sie funktionieren.<br>... <i>how particular types of contracts are concluded (e.g., leases, service contracts, loan agreements, etc.) and how they work...</i>  |
| Zivilrecht Vertiefung<br>civil law specialization      |                                                                                                                                                                                                                                                                                |
| Variablenname<br><i>Variable name</i>                  | Wortlaut<br><i>Item wording</i>                                                                                                                                                                                                                                                |
| UJU_Zivilrecht Vertiefung_1                            | ... sich auf das erste juristische Staatsexamen im Bereich Zivilrecht vorzubereiten.<br>... <i>preparing for the first state law exam in the area of civil law...</i>                                                                                                          |
| UJU_Zivilrecht Vertiefung_2                            | ... wie zivilrechtliche Ansprüche in der Praxis geltend gemacht werden können.<br>... <i>how civil claims can be brought in practice...</i>                                                                                                                                    |
| Öffentliches Wirtschaftsrecht<br>public commercial law |                                                                                                                                                                                                                                                                                |
| Variablenname<br><i>Variable name</i>                  | Wortlaut<br><i>Item wording</i>                                                                                                                                                                                                                                                |
| UJU_OeffWR_1                                           | ... wie die Europäische Union funktioniert und welchen Einfluss das Europarecht auf das deutsche Recht hat.<br>... <i>how the European Union functions and what influence European law has on German law...</i>                                                                |



|                                                                       |                                                                                                                                                                                                                                                                                                                                            |
|-----------------------------------------------------------------------|--------------------------------------------------------------------------------------------------------------------------------------------------------------------------------------------------------------------------------------------------------------------------------------------------------------------------------------------|
| UJU_OeffWR_2                                                          | ... welche Grundrechte man hat und welche für die Wirtschaft besonders relevant sind.<br>.. <i>which fundamental rights one has and which are particularly relevant for the economy ...</i>                                                                                                                                                |
| UJU_OeffWR_3                                                          | ... wie die Gewaltenteilung zwischen Regierung, Parlament und Justiz funktioniert.<br>... <i>how the separation of powers between government, parliament and the judiciary works...</i>                                                                                                                                                    |
| UJU_OeffWR_4                                                          | ... wie Behörden handeln und welche Rechtsmittel es gegen behördliches Handeln gibt.<br>... <i>how authorities act and what legal remedies are available against official actions...</i>                                                                                                                                                   |
| Wirtschaftsrecht Allgemeiner Teil<br><i>economic law general part</i> |                                                                                                                                                                                                                                                                                                                                            |
| Variablenname<br><i>Variable name</i>                                 | Wortlaut<br><i>Item wording</i>                                                                                                                                                                                                                                                                                                            |
| UJU_WR_1                                                              | ... wie der Zusammenschluss mehrerer Personen zu einer Gesellschaft (z.B. AG, GmbH, KG) rechtlich geregelt wird.<br>... <i>how the merger of several persons into one company (e.g. AG, GmbH, KG) is legally regulated...</i>                                                                                                              |
| UJU_WR_2                                                              | ... welche besonderen Regeln für Handelsgeschäfte gelten wie z.B. einen Kaufvertrag zwischen Kaufleuten*.<br>... <i>what special rules apply to commercial transactions such as a contract of sale between merchants*...</i>                                                                                                               |
| UJU_WR_3                                                              | ... wie man einen Kredit absichert z.B. mit einer Bürgschaft oder einer Hypothek.<br>... <i>how to secure a loan, e.g., with a guarantee or a mortgage...</i>                                                                                                                                                                              |
| UJU_WR_4                                                              | ... welche Rechte und Pflichten Arbeitnehmer und Arbeitgeber haben (z.B. wie man gegen eine Kündigung vorgehen kann).<br>... <i>what rights and obligations employees and employers have (e.g., how to take action against a dismissal)...</i>                                                                                             |
| UJU_WR_5                                                              | ... welchen wirtschaftlichen Zweck rechtliche Regeln haben, z.B. welche Schadensersatzregelung durch Vermeidung gefährlichen Verhaltens am ehesten zum Einsparen von Ressourcen führt.<br>... <i>the economic purpose of legal rules, e.g., which compensation rule is most likely to save resources by avoiding dangerous behavior...</i> |
| Externes Rechnungswesen<br><i>external accounting</i>                 |                                                                                                                                                                                                                                                                                                                                            |
| Variablenname<br><i>Variable name</i>                                 | Wortlaut<br><i>Item wording</i>                                                                                                                                                                                                                                                                                                            |
| UJU_ERW_1                                                             | ... das System der doppelten Buchführung* kennenzulernen und anzuwenden.<br>... <i>learning about and applying the system of double-entry bookkeeping*...</i>                                                                                                                                                                              |
| UJU_ERW_2                                                             | ... zu lernen, was eine Bilanz ist.<br>... <i>learning what a balance sheet is...</i>                                                                                                                                                                                                                                                      |
| Finanzwirtschaft<br><i>financial economics</i>                        |                                                                                                                                                                                                                                                                                                                                            |
| Variablenname<br><i>Variable name</i>                                 | Wortlaut<br><i>Item wording</i>                                                                                                                                                                                                                                                                                                            |
| UJU_FiWi_1                                                            | ... wie Unternehmen und Privatpersonen finanzielle Entscheidungen treffen (sollten).<br>... <i>how businesses and individuals (should) make financial decisions...</i>                                                                                                                                                                     |
| UJU_FiWi_2                                                            | ... wie Finanzmärkte funktionieren.<br>... <i>how financial markets work...</i>                                                                                                                                                                                                                                                            |

|            |                                                                                                                                                |
|------------|------------------------------------------------------------------------------------------------------------------------------------------------|
| UJU_FiWi_3 | ... wie Risiken den Preis von Wertpapieren (z.B. Aktien) beeinflussen.<br>... <i>how risk affects the price of securities (e.g., stock)...</i> |
|------------|------------------------------------------------------------------------------------------------------------------------------------------------|

|                                                                                |  |
|--------------------------------------------------------------------------------|--|
| Grundlagen der Finanzmathematik<br><i>fundamentals of mathematical finance</i> |  |
|--------------------------------------------------------------------------------|--|

|                                       |                                 |
|---------------------------------------|---------------------------------|
| Variablenname<br><i>Variable name</i> | Wortlaut<br><i>Item wording</i> |
|---------------------------------------|---------------------------------|

|            |                                                                                                               |
|------------|---------------------------------------------------------------------------------------------------------------|
| UJU_FiMa_1 | ... wie man einen aufgenommenen Kredit zurückbezahlt (tilgt).<br>... <i>how to pay back (repay) a loan...</i> |
|------------|---------------------------------------------------------------------------------------------------------------|

|            |                                                                                                                                  |
|------------|----------------------------------------------------------------------------------------------------------------------------------|
| UJU_FiMa_2 | ... wie man den jährlichen Ertrag von Investitionen berechnet.<br>... <i>how to calculate the annual return on investment...</i> |
|------------|----------------------------------------------------------------------------------------------------------------------------------|

|                                                                          |  |
|--------------------------------------------------------------------------|--|
| Grundlagen der Volkswirtschaftslehre<br><i>fundamentals of economics</i> |  |
|--------------------------------------------------------------------------|--|

|                                       |                                 |
|---------------------------------------|---------------------------------|
| Variablenname<br><i>Variable name</i> | Wortlaut<br><i>Item wording</i> |
|---------------------------------------|---------------------------------|

|           |                                                                                              |
|-----------|----------------------------------------------------------------------------------------------|
| UJU_VWL_1 | ... wie unser Wirtschaftssystem funktioniert.<br>... <i>how our economic system works...</i> |
|-----------|----------------------------------------------------------------------------------------------|

|           |                                                                                                                                                                                                                                                                                           |
|-----------|-------------------------------------------------------------------------------------------------------------------------------------------------------------------------------------------------------------------------------------------------------------------------------------------|
| UJU_VWL_2 | ... wie unser Staat auf das wirtschaftliche Geschehen Einfluss nehmen kann und welche potenziellen Grenzen und Konsequenzen diese Einflussnahme haben kann.<br>... <i>how our government can influence economic events and the potential limits and consequences of that influence...</i> |
|-----------|-------------------------------------------------------------------------------------------------------------------------------------------------------------------------------------------------------------------------------------------------------------------------------------------|

|                                           |  |
|-------------------------------------------|--|
| Human Resources<br><i>human resources</i> |  |
|-------------------------------------------|--|

|                                       |                                 |
|---------------------------------------|---------------------------------|
| Variablenname<br><i>Variable name</i> | Wortlaut<br><i>Item wording</i> |
|---------------------------------------|---------------------------------|

|          |                                                                                                                                                                                                                                                                                                                                             |
|----------|---------------------------------------------------------------------------------------------------------------------------------------------------------------------------------------------------------------------------------------------------------------------------------------------------------------------------------------------|
| UJU_HR_1 | ... wie Betriebsstrukturen verändert werden können (z.B. Anpassung von Arbeitszeitmodellen, betrieblicher Ausstattung, Anreize setzen für junge Mitarbeiter, ...).<br>... <i>how operational structures can be changed (e.g. adaptation of working time models, operational equipment, setting incentives for young employees, ...) ...</i> |
|----------|---------------------------------------------------------------------------------------------------------------------------------------------------------------------------------------------------------------------------------------------------------------------------------------------------------------------------------------------|

|          |                                                                                                                                                     |
|----------|-----------------------------------------------------------------------------------------------------------------------------------------------------|
| UJU_HR_2 | ... wie Unternehmer ihr Personal auswählen, fördern und entlohnen.<br>... <i>how business owners select, promote, and compensate their staff...</i> |
|----------|-----------------------------------------------------------------------------------------------------------------------------------------------------|

|          |                                                                                                           |
|----------|-----------------------------------------------------------------------------------------------------------|
| UJU_HR_3 | ... wie Arbeitsverhältnisse gestaltet werden können.<br>... <i>how labor relations can be designed...</i> |
|----------|-----------------------------------------------------------------------------------------------------------|

|                                                       |  |
|-------------------------------------------------------|--|
| Internes Rechnungswesen<br><i>internal accounting</i> |  |
|-------------------------------------------------------|--|

|                                       |                                 |
|---------------------------------------|---------------------------------|
| Variablenname<br><i>Variable name</i> | Wortlaut<br><i>Item wording</i> |
|---------------------------------------|---------------------------------|

|           |                                                                                                                                                                                                   |
|-----------|---------------------------------------------------------------------------------------------------------------------------------------------------------------------------------------------------|
| UJU_IRW_1 | ... Ansätze, Methoden und Techniken zur Ermittlung von in Unternehmen anfallenden Kosten zu erlernen und diese Kosten einzelnen Kostenträgern (z.B. einem Produkt wie einem Computer) zuzuordnen. |
|-----------|---------------------------------------------------------------------------------------------------------------------------------------------------------------------------------------------------|

|           |                                                                                                                                                                                                                                                                                                                                                                                                                                                                                                              |
|-----------|--------------------------------------------------------------------------------------------------------------------------------------------------------------------------------------------------------------------------------------------------------------------------------------------------------------------------------------------------------------------------------------------------------------------------------------------------------------------------------------------------------------|
|           | <i>... learning approaches, methods, and techniques for determining costs incurred in companies and assigning those costs to individual cost objects (e.g., a product such as a computer)...</i>                                                                                                                                                                                                                                                                                                             |
| UJU_IRW_2 | <i>... wie man feststellt, ob ein Produkt (z. B. Computer) profitabel ist, in dem anfallende Einzelkosten (z. B. Materialkosten für den Computer) und Gemeinkosten (z. B. für die Personalabteilung, Miete) von den Erlösen des Produkts abgezogen werden.<br/>... how to determine whether a product (e.g., computer) is profitable by subtracting direct costs incurred (e.g., cost of materials for the computer) and overhead costs (e.g., for human resources, rent) from the product's revenues...</i> |

| Management<br><i>management</i>       |                                                                                                                                                                                                                                                                                                                                                  |
|---------------------------------------|--------------------------------------------------------------------------------------------------------------------------------------------------------------------------------------------------------------------------------------------------------------------------------------------------------------------------------------------------|
| Variablenname<br><i>Variable name</i> | Wortlaut<br><i>Item wording</i>                                                                                                                                                                                                                                                                                                                  |
| UJU_MGMT_1                            | <i>... was Unternehmen sind und wie diese geführt werden.<br/>... what companies are and how they are managed...</i>                                                                                                                                                                                                                             |
| UJU_MGMT_2                            | <i>... wie aktuelle Herausforderungen (z.B. Globalisierung, Digitalisierung, Klimawandel) den Managementprozess von Unternehmen (z.B. Planung und Personal) beeinflussen.<br/>... how current challenges (e.g. globalization, digitalization, climate change) influence the management process of companies (e.g. planning and personnel)...</i> |
| Marketing<br><i>marketing</i>         |                                                                                                                                                                                                                                                                                                                                                  |
| Variablenname<br><i>Variable name</i> | Wortlaut<br><i>Item wording</i>                                                                                                                                                                                                                                                                                                                  |
| UJU_MKT_1                             | <i>... wie Unternehmen ihre Produkte effektiv vermarkten können.<br/>... how companies can effectively market their products...</i>                                                                                                                                                                                                              |
| UJU_MKT_2                             | <i>... wie Konsumenten sich im Kaufprozess verhalten.<br/>... how consumers behave in the buying process...</i>                                                                                                                                                                                                                                  |

| Tax and Accounting<br><i>tax and accounting</i> |                                                                                                                                                                                                                                                           |
|-------------------------------------------------|-----------------------------------------------------------------------------------------------------------------------------------------------------------------------------------------------------------------------------------------------------------|
| Variablenname<br><i>Variable name</i>           | Wortlaut<br><i>Item wording</i>                                                                                                                                                                                                                           |
| UJU_TaxAcc_1                                    | <i>... welche Finanzkennzahlen Unternehmen dem Finanzamt offenlegen müssen (z.B. Jahresabschluss, Steuerbilanz).<br/>... which financial ratios companies have to disclose to the tax office (e.g. annual financial statements, tax balance sheet)...</i> |
| UJU_TaxAcc_2                                    | <i>... wie Unternehmen besteuert werden.<br/>... how companies are taxed...</i>                                                                                                                                                                           |
| UJU_TaxAcc_3                                    | <i>... was Einkommenssteuer ist und wie sie ermittelt wird.<br/>... what income tax is and how it is determined...</i>                                                                                                                                    |

| Anforderungen<br><i>requirements</i>  |                                                                                                                                                                                                                 |
|---------------------------------------|-----------------------------------------------------------------------------------------------------------------------------------------------------------------------------------------------------------------|
| Variablenname<br><i>Variable name</i> | Wortlaut<br><i>Item wording</i>                                                                                                                                                                                 |
| UJU_<br>Anforderung 1                 | ... Argumentationen auszuarbeiten, um einen rechtlichen Standpunkt zu stützen/vertreten.<br><i>... developing arguments to support/represent a legal position...</i>                                            |
| UJU_<br>Anforderung 2                 | ... sich mit englischer Fachliteratur auseinanderzusetzen.<br><i>... dealing with English technical literature...</i>                                                                                           |
| UJU_<br>Anforderung 3                 | ... Diskussionen mit DozentInnen und KommilitonInnen in englischer Sprache zu führen.<br><i>... having discussions with lecturers and fellow students in English...</i>                                         |
| UJU_<br>Anforderung 4                 | ... mit Paragraphen aus Gesetzestexten, wie beispielsweise dem Bürgerlichen Gesetzbuch (BGB) zu arbeiten.<br><i>... working with paragraphs from legal texts, such as the German Civil Code (BGB)...</i>        |
| UJU_<br>Anforderung 5                 | ... Rechtsmeinungen anderer kritisch zu bewerten und sich ein unabhängiges Urteil zu bilden.<br><i>... critically evaluating legal opinions of others and forming an independent judgment...</i>                |
| UJU_<br>Anforderung 6                 | ... sein erworbenes Wissen in schriftlichen Prüfungen wiederzugeben.<br><i>... reproducing your acquired knowledge in written examinations...</i>                                                               |
| UJU_<br>Anforderung 7                 | ... wissenschaftliche Texte (Hausarbeiten, Abschlussarbeit, Essay) zu verfassen.<br><i>... writing scientific texts (term papers, thesis, essay)...</i>                                                         |
| UJU_<br>Anforderung 8                 | ... finanzmathematisches Wissen anzuwenden (z.B. Bewertung von Zahlungsströmen, Zinsrechnung).<br><i>... applying financial mathematical knowledge (e.g., valuation of cash flows, interest calculation)...</i> |
| UJU_<br>Anforderung 9                 | ... Verhandlungssituationen im Rollenspiel zu improvisieren.<br><i>... improvising negotiation situations in role play...</i>                                                                                   |
| UJU_<br>Anforderung 10                | ... theoretisches Wissen praktisch anzuwenden.<br><i>... applying theoretical knowledge in practice...</i>                                                                                                      |
| UJU_<br>Anforderung 11                | ... eigenständig sein Profil zu schärfen und Schwerpunkte zu setzen (z.B. Praktikum, Wahlbereiche).<br><i>... independently refining your profile and setting priorities (e.g. internship, electives)...</i>    |

## Pre- and Post-Survey

### 1. Studienwahlintention / Intention to choose a study major (Pre- and Post-Survey)

#### 1.1 Wahlentschlossenheit / Decisiveness to choose a study major (Pre- and Post-Survey)

|                                                              |                                                                                                                                                                                                                                                                                                                                                                      |
|--------------------------------------------------------------|----------------------------------------------------------------------------------------------------------------------------------------------------------------------------------------------------------------------------------------------------------------------------------------------------------------------------------------------------------------------|
| Quelle<br><i>Source</i>                                      | <i>Authors anonymized (2017)</i>                                                                                                                                                                                                                                                                                                                                     |
| Variablenname<br><i>Variable name</i>                        | Wahlentschlossenheit_Prae<br>Wahlentschlossenheit_Post                                                                                                                                                                                                                                                                                                               |
| Itemwortlaut<br><i>Item wording</i>                          | Wie entschieden sind Sie momentan im Hinblick darauf, das Studienfach ... anzufangen?<br><i>How decided are you right now to enter this study major?</i>                                                                                                                                                                                                             |
| Antwortformat<br><i>Response format</i>                      | Geschlossen, 4-stufig / <i>closed response format, four-stage format</i><br>1 = sehr unentschieden ( <i>very undecided</i> ), 2 = eher unentschieden ( <i>rather undecided</i> ), 3 = ziemlich entschieden ( <i>quite decided</i> ), 4 = sehr entschieden ( <i>very decided</i> )                                                                                    |
| Instruktion Prä-Befragung<br><i>Instruction Pre-Survey</i>   | Die nächsten Fragen beziehen sich auf Ihre momentane Absicht, das Studienfach ... aufzunehmen. Bitte geben Sie an, was Sie jetzt im Moment denken.<br><i>The next questions relate to your current intention to take up study major .... Please state what you are thinking right now.</i>                                                                           |
| Instruktion Post-Befragung<br><i>Instruction Post-Survey</i> | Nachdem Sie nun einiges darüber erfahren haben, was Sie im Studienfach ... erwartet, möchten wir Sie erneut bitten, Ihre momentane Absicht, das Studienfach aufzunehmen, anzugeben.<br><i>Now that you have learned a lot about what to expect in study major ..., we would like to ask you again to indicate your current intention to take up the study major.</i> |

#### 1.2 Wahlsicherheit / Certainty to choose a study major (Pre- and Post-Survey)

|                                       |                                                                                                                                                           |
|---------------------------------------|-----------------------------------------------------------------------------------------------------------------------------------------------------------|
| Quelle<br><i>Source</i>               | <i>Authors anonymized (2017)</i>                                                                                                                          |
| Variablenname<br><i>Variable name</i> | Wahlsicherheit_Prae<br>Wahlsicherheit_Post                                                                                                                |
| Itemwortlaut<br><i>Item wording</i>   | Wie sicher sind Sie sich im Moment, dass Sie das angegebene Studium tatsächlich ergreifen werden? 0% bedeutet total unsicher, 100% bedeutet total sicher. |

|                                                              |                                                                                                                                                                                                                                                                                                                                                                      |
|--------------------------------------------------------------|----------------------------------------------------------------------------------------------------------------------------------------------------------------------------------------------------------------------------------------------------------------------------------------------------------------------------------------------------------------------|
|                                                              | <i>How certain are you at this point that you will enter this study major?</i>                                                                                                                                                                                                                                                                                       |
| Antwortformat<br><i>Response format</i>                      | Geschlossen, 11-stufig / <i>closed response format, eleven-stage format</i><br>1 = 0%, 2 = 10%, 3 = 20%, 4 = 30%, 5 = 40%, 6 = 50%, 7 = 60%, 8 = 70%, 9 = 80%, 10 = 90%, 11 = 100%                                                                                                                                                                                   |
| Instruktion Prä-Befragung<br><i>Instruction Pre-Survey</i>   | Die nächsten Fragen beziehen sich auf Ihre momentane Absicht, das Studienfach ... aufzunehmen. Bitte geben Sie an, was Sie jetzt im Moment denken.<br><i>The next questions relate to your current intention to take up study major .... Please state what you are thinking right now.</i>                                                                           |
| Instruktion Post-Befragung<br><i>Instruction Post-Survey</i> | Nachdem Sie nun einiges darüber erfahren haben, was Sie im Studienfach ... erwartet, möchten wir Sie erneut bitten, Ihre momentane Absicht, das Studienfach aufzunehmen, anzugeben.<br><i>Now that you have learned a lot about what to expect in study major ..., we would like to ask you again to indicate your current intention to take up the study major.</i> |

## 2. Subjektiver Wert bezüglich des angestrebten Studienfachs / *Subjective Values of the study major*

### 2.1 Intrinsischer Wert (Prä/Post) / *Intrinsic Value (Pre- and Post-Survey)*

|                                                                         |                                                                                                                                                                                                                                    |                                                                                                                                                                 |
|-------------------------------------------------------------------------|------------------------------------------------------------------------------------------------------------------------------------------------------------------------------------------------------------------------------------|-----------------------------------------------------------------------------------------------------------------------------------------------------------------|
| Quelle<br><i>Source</i>                                                 | <i>Measured with a German questionnaire inspired by items from Authors anonymized (2017) based on Steinmayr &amp; Spinath (2010)</i>                                                                                               |                                                                                                                                                                 |
| Variablenname und Itemwortlaut<br><i>Variable name and item wording</i> | IntrinsischerWert1_Prae<br>IntrinsischerWert1_Post                                                                                                                                                                                 | Ich erwarte, dass ich die Dinge, die ich im Studienfach ... lerne, gerne mache.<br><i>I expect to enjoy doing the things I am learning in study major ... .</i> |
|                                                                         | IntrinsischerWert2_Prae<br>IntrinsischerWert2_Post                                                                                                                                                                                 | Ich erwarte, dass mir das Studienfach ... Spaß machen wird.<br><i>I expect to like this study major ... .</i>                                                   |
|                                                                         | IntrinsischerWert3_Prae<br>IntrinsischerWert3_Post                                                                                                                                                                                 | Ich erwarte, dass ich das, was ich im Studienfach ... lerne, interessant finde.<br><i>I expect to find what I learn in study major ... interesting.</i>         |
| Antwortformat<br><i>Response format</i>                                 | Geschlossen, 5-stufig, ohne Zwischenbeschriftung / <i>closed response format, five-stage format, no intermediate labelling</i><br>1 = trifft gar nicht zu / <i>not at all</i><br>5 = trifft vollkommen zu / <i>completely true</i> |                                                                                                                                                                 |
| Instruktion Prä-Befragung<br><i>Instruction Pre-Survey</i>              | Im Folgenden möchten wir Ihnen ein paar Fragen zu Ihren Erwartungen hinsichtlich dieses Studiums stellen. Bitte kreuzen Sie bei jeder Aussage an, wie sehr sie auf Sie zutrifft.                                                   |                                                                                                                                                                 |

|                                                              |                                                                                                                                                                                                                                                                                         |
|--------------------------------------------------------------|-----------------------------------------------------------------------------------------------------------------------------------------------------------------------------------------------------------------------------------------------------------------------------------------|
|                                                              | <i>In the following, we would like to ask you a few questions about your expectations regarding this study major. For each statement, please mark how much it applies to you.</i>                                                                                                       |
| Instruktion Post-Befragung<br><i>Instruction Post-Survey</i> | Nun möchten wir Ihnen erneut ein paar Fragen zu Ihren Erwartungen hinsichtlich dieses Studiums stellen. Bitte beantworten Sie jede Frage.<br><i>Now we would like to ask you a few questions again about your expectations regarding this study major. Please answer each question.</i> |

## 2.2 Nützlichkeit (Prä/Post) / *Utility value (Pre- and Post-Survey)*

|                                                                                |                                                                                                                                                                                                                                                                                                                                                                       |                                                                                                                                                                                                           |
|--------------------------------------------------------------------------------|-----------------------------------------------------------------------------------------------------------------------------------------------------------------------------------------------------------------------------------------------------------------------------------------------------------------------------------------------------------------------|-----------------------------------------------------------------------------------------------------------------------------------------------------------------------------------------------------------|
| Quelle / <i>Source</i>                                                         | <i>Measured with a German questionnaire inspired by items from Authors anonymized (2017) based on Steinmayr &amp; Spinath (2010)</i>                                                                                                                                                                                                                                  |                                                                                                                                                                                                           |
| Variablenname und<br>Itemwortlaut<br><i>Variable name and item<br/>wording</i> | Nuetzlichkeit1_prae<br>Nuetzlichkeit1_post                                                                                                                                                                                                                                                                                                                            | Ich erwarte, dass die Dinge, die ich im Studienfach ... lerne, für mein Leben im Allgemeinen nützlich sind.<br><i>I expect the things I learn in study major ... to be useful for my life in general.</i> |
|                                                                                | Nuetzlichkeit2_prae<br>Nuetzlichkeit2_post                                                                                                                                                                                                                                                                                                                            | Ich erwarte, dass das Studienfach ... nützlich für meine persönliche Zukunft ist.<br><i>I expect that what I learn in this study major ... will be useful for my personal future.</i>                     |
|                                                                                | Nuetzlichkeit3_prae<br>Nuetzlichkeit3_post                                                                                                                                                                                                                                                                                                                            | Ich erwarte, dass das Studienfach ... mir in meinem Leben noch weiterhelfen wird.<br><i>I expect that the study major ... will be of further help to me in my life.</i>                                   |
| Antwortformat<br><i>Response format</i>                                        | Geschlossen, 5-stufig, ohne Zwischenbeschriftung / <i>closed response format, five-stage format, no intermediate labelling</i><br>1 = trifft gar nicht zu / <i>not at all</i><br>5 = trifft vollkommen zu / <i>completely true</i>                                                                                                                                    |                                                                                                                                                                                                           |
| Instruktion Prä-Befragung<br><i>Instruction Pre-Survey</i>                     | Im Folgenden möchten wir Ihnen ein paar Fragen zu Ihren Erwartungen hinsichtlich dieses Studiums stellen. Bitte kreuzen Sie bei jeder Aussage an, wie sehr sie auf Sie zutrifft.<br><i>In the following, we would like to ask you a few questions about your expectations regarding this study major. For each statement, please mark how much it applies to you.</i> |                                                                                                                                                                                                           |
| Instruktion Post-Befragung<br><i>Instruction Post-Survey</i>                   | Nun möchten wir Ihnen erneut ein paar Fragen zu Ihren Erwartungen hinsichtlich dieses Studiums stellen. Bitte beantworten Sie jede Frage.<br><i>Now we would like to ask you a few questions again about your expectations regarding this study major. Please answer each question.</i>                                                                               |                                                                                                                                                                                                           |

### 2.3 Persönliche Wichtigkeit (Prä/Post) / *Attainment value (Pre- and Post-Survey)*

|                                                                         |                                                                                                                                                                                                                                                                                                                                                                       |                                                                                                                                                                                       |
|-------------------------------------------------------------------------|-----------------------------------------------------------------------------------------------------------------------------------------------------------------------------------------------------------------------------------------------------------------------------------------------------------------------------------------------------------------------|---------------------------------------------------------------------------------------------------------------------------------------------------------------------------------------|
| Quelle / <i>Source</i>                                                  | <i>Measured with a German questionnaire inspired by items from Authors anonymized (2017) based on Steinmayr &amp; Spinath (2010)</i>                                                                                                                                                                                                                                  |                                                                                                                                                                                       |
| Variablenname und Itemwortlaut<br><i>Variable name and item wording</i> | Wichtigkeit1_Prae<br>Wichtigkeit1_Post                                                                                                                                                                                                                                                                                                                                | Ich erwarte, dass ich im Studienfach ... Dinge mache, die mir persönlich viel bedeuten.<br><i>I expect to do things in study major ... that mean a lot to me personally.</i>          |
|                                                                         | Wichtigkeit2_Prae<br>Wichtigkeit2_Post                                                                                                                                                                                                                                                                                                                                | Ich erwarte, dass ich im Studienfach ... Dinge mache, die mir wichtig sind.<br><i>I expect that I will do things in this study major ... that are important to me.</i>                |
|                                                                         | Wichtigkeit3_Prae<br>Wichtigkeit3_Post                                                                                                                                                                                                                                                                                                                                | Ich erwarte, dass ich im Studienfach ... Dinge mache, die für mich als Person zentral sind.<br><i>I expect to do things in my study major ... that are central to me as a person.</i> |
| Antwortformat<br><i>Response format</i>                                 | Geschlossen, 5-stufig, ohne Zwischenbeschriftung / <i>closed response format, five-stage format, no intermediate labelling</i><br>1 = trifft gar nicht zu / <i>not at all</i><br>5 = trifft vollkommen zu / <i>completely true</i>                                                                                                                                    |                                                                                                                                                                                       |
| Instruktion Prä-Befragung<br><i>Instruction Pre-Survey</i>              | Im Folgenden möchten wir Ihnen ein paar Fragen zu Ihren Erwartungen hinsichtlich dieses Studiums stellen. Bitte kreuzen Sie bei jeder Aussage an, wie sehr sie auf Sie zutrifft.<br><i>In the following, we would like to ask you a few questions about your expectations regarding this study major. For each statement, please mark how much it applies to you.</i> |                                                                                                                                                                                       |
| Instruktion Post-Befragung<br><i>Instruction Post-Survey</i>            | Nun möchten wir Ihnen erneut ein paar Fragen zu Ihren Erwartungen hinsichtlich dieses Studiums stellen. Bitte beantworten Sie jede Frage.<br><i>Now we would like to ask you a few questions again about your expectations regarding this study major. Please answer each question.</i>                                                                               |                                                                                                                                                                                       |

### 2.4 Kosten (Prä/Post) / *Costs (Pre- and Post-Survey)*

|                                                                         |                                                                                                                                      |                                                                                                                                                                       |
|-------------------------------------------------------------------------|--------------------------------------------------------------------------------------------------------------------------------------|-----------------------------------------------------------------------------------------------------------------------------------------------------------------------|
| Quelle / <i>Source</i>                                                  | <i>Measured with a German questionnaire inspired by items from Authors anonymized (2017) based on Steinmayr &amp; Spinath (2010)</i> |                                                                                                                                                                       |
| Variablenname und Itemwortlaut<br><i>Variable name and item wording</i> | Kosten1_Prae<br>Kosten1_Post                                                                                                         | Ich erwarte, dass ich für das Studienfach ... eine Menge Aufwand betreiben muss.<br><i>I expect that I have to put in a lot of effort for the study major ... .</i>   |
|                                                                         | Kosten2_Prae<br>Kosten2_Post                                                                                                         | Ich erwarte, dass ich für das Studienfach ... eine Menge Zeit investieren muss.<br><i>I expect that I will have to invest a lot of time in this study major ... .</i> |
|                                                                         | Kosten3_Prae<br>Kosten3_Post                                                                                                         | Ich erwarte, dass ich für das Studienfach ... viel lernen muss.<br><i>I expect that I have to study a lot for the study major ... .</i>                               |



|                                                              |                                                                                                                                                                                                                                                                                                                                                                       |
|--------------------------------------------------------------|-----------------------------------------------------------------------------------------------------------------------------------------------------------------------------------------------------------------------------------------------------------------------------------------------------------------------------------------------------------------------|
| Antwortformat<br><i>Response format</i>                      | Geschlossen, 5-stufig, ohne Zwischenbeschriftung / <i>closed response format, five-stage format, no intermediate labelling</i><br>1 = trifft gar nicht zu / <i>not at all</i><br>5 = trifft vollkommen zu / <i>completely true</i>                                                                                                                                    |
| Instruktion Prä-Befragung<br><i>Instruction Pre-Survey</i>   | Im Folgenden möchten wir Ihnen ein paar Fragen zu Ihren Erwartungen hinsichtlich dieses Studiums stellen. Bitte kreuzen Sie bei jeder Aussage an, wie sehr sie auf Sie zutrifft.<br><i>In the following, we would like to ask you a few questions about your expectations regarding this study major. For each statement, please mark how much it applies to you.</i> |
| Instruktion Post-Befragung<br><i>Instruction Post-Survey</i> | Nun möchten wir Ihnen erneut ein paar Fragen zu Ihren Erwartungen hinsichtlich dieses Studiums stellen. Bitte beantworten Sie jede Frage.<br><i>Now we would like to ask you a few questions again about your expectations regarding this study major. Please answer each question.</i>                                                                               |

### 3. Erfolgserwartung (Prä/Post) / *Expectancies for success (Pre- and Post-Survey)*

|                                                                                |                                                                                                                                                                                                                                                                                                                                                                                                                                                                             |                                                                                                   |
|--------------------------------------------------------------------------------|-----------------------------------------------------------------------------------------------------------------------------------------------------------------------------------------------------------------------------------------------------------------------------------------------------------------------------------------------------------------------------------------------------------------------------------------------------------------------------|---------------------------------------------------------------------------------------------------|
| Quelle / <i>Source</i>                                                         | <i>Measured with a German questionnaire inspired by items from Authors anonymized (2017) based on Poloczek &amp; Greb (2011).</i>                                                                                                                                                                                                                                                                                                                                           |                                                                                                   |
| Variablenname und<br>Itemwortlaut<br><i>Variable name and item<br/>wording</i> | Erfolgserwartung1_Prae<br>Erfolgserwartung1_Post                                                                                                                                                                                                                                                                                                                                                                                                                            | Ich werde die Inhalte im Studienfach ...<br><i>I will learn the content of the study major...</i> |
|                                                                                | Erfolgserwartung2_Prae<br>Erfolgserwartung2_Post                                                                                                                                                                                                                                                                                                                                                                                                                            | Mir wird das Studienfach ...<br><i>I will find studying in this study major...</i>                |
|                                                                                | Erfolgserwartung3_Prae<br>Erfolgserwartung3_Post                                                                                                                                                                                                                                                                                                                                                                                                                            | Ich werde im Studienfach ...<br><i>In this study major I will do...</i>                           |
| Antwortformat<br><i>Response format</i>                                        | Geschlossen, 7-stufig, ohne Zwischenbeschriftung / <i>closed response format, seven-stage format, no intermediate labelling</i><br>Erfolgserwartung1: 1 = sehr langsam lernen, 7 = sehr schnell lernen / 1 (...very slowly) to 7 (...very quickly.)<br>Erfolgserwartung2: 1 = nicht leicht fallen, 7 = sehr leicht fallen / 1 (...very easy) to 7 (...very difficult)<br>Erfolgserwartung3: 1 = sehr schlecht sein, 7 = sehr gut sein / 1 (...very well) to 7 (...very bad) |                                                                                                   |
| Instruktion Prä-Befragung<br><i>Instruction Pre-Survey</i>                     | Was denken Sie? Bitte kreuzen Sie bei jeder Aussage an, wie sehr diese auf Sie zutrifft.<br><i>What do you think? For each statement, please mark how much it applies to you.</i>                                                                                                                                                                                                                                                                                           |                                                                                                   |
| Instruktion Post-Befragung<br><i>Instruction Post-Survey</i>                   | Und was denken Sie jetzt? Bitte kreuzen Sie bei jeder Aussage an, wie sehr diese auf Sie zutrifft.<br><i>And what do you think now? For each statement, please mark how much it applies to you.</i>                                                                                                                                                                                                                                                                         |                                                                                                   |
