# Supplementary material for: Change my mind
Source: Atypon-hosted journal article supplement (doi:10.1024/1010-0652/a000379), 2024-03-18
Supplement: 1010-0652_a000379_esm3.pdf [file 1010-0652_a000379_esm3.pdf]

### Electronic Supplementary Material 3

**Table E1.** Mean Scores, Standard Deviations, and Intercorrelations for All Continuous Variables of the Hierarchical Multivariate Moderated Regression Analysis

| Variable                           | <i>M</i> | <i>SD</i> | 1      | 2     | 3     | 4     | 5     | 6    | 7   |
|------------------------------------|----------|-----------|--------|-------|-------|-------|-------|------|-----|
| 1. Expectation-Reality Discrepancy | 1.05     | 0.25      | -      | .26   | .21   | .20   | .16   | .12  | .15 |
| 2. Ch. Expectancies for Success    | 0.42     | 0.50      | < .001 | -     | .40   | .32   | .15   | .18  | .19 |
| 3. Ch. Intrinsic Value             | 0.48     | 0.65      | .001   | <.001 | -     | .58   | .51   | .29  | .36 |
| 4. Ch. Utility Value               | 0.41     | 0.51      | .002   | <.001 | <.001 | -     | .38   | .39  | .23 |
| 5. Ch. Attainment Value            | 0.47     | 0.48      | .013   | .019  | <.001 | <.001 | -     | .22  | .04 |
| 6. Ch. Costs                       | 0.42     | 0.51      | .066   | .006  | <.001 | <.001 | <.001 | -    | .08 |
| 7. Ch. Intention                   | 0.43     | 0.39      | .020   | .004  | <.001 | <.001 | .522  | .224 | -   |

*Notes:* *N* = 234; Ch. = Change in; All outcome variables represent absolute values of the difference between the pre- and post-measures of the respective construct; *p*-values can be found below the diagonal.
